# Supplementary material for: Bamboo tea: reduction of taxonomic complexity and application of DNA diagnostics based on rbcL and matK sequence data
Source: PeerJ journal article supplement (doi:10.7717/peerj.2781), 2016-12-08
Supplement: supplementary-tables-clean.pdf [file supplementary-tables-clean.pdf]

## SUPPLEMENTARY TABLES

### LIST OF TABLES

|   |                                                                  |   |
|---|------------------------------------------------------------------|---|
| 1 | List of universal and diagnostic primer . . . . .                | 1 |
| 3 | Genbank sequence accessions (cytoplasmic) . . . . .              | 1 |
| 4 | Genbank sequence accessions (nuclear) . . . . .                  | 2 |
| 2 | List of secondary specimens (lemongrass and carnation) . . . . . | 5 |
| 5 | Anatomical diagnostic key . . . . .                              | 6 |
| 6 | BLOG bamboo tribe classification results . . . . .               | 7 |

**Table 1.** List of universal and diagnostic (ARMS) primer used in the current study. The table includes primer names and sequences, melting temperatures (Tm) of each individual primer, the annealing temperatures (An) for each primer pair and references to corresponding publications.

| Name                      | Sequence (5'...3')                     | Tm (°C) | An (°C) | Design                    |
|---------------------------|----------------------------------------|---------|---------|---------------------------|
| rbcLa-f <sup>u</sup>      | ATGTCACCACAAACAGAGACTAAAGC             | 62.2    | 58      | Kondo et al. [1996]       |
| rbcLa-rev <sup>u</sup>    | GTAAAATCAAGTCCACCRCG                   | 74.7    |         | Fofana et al. [1997]      |
| rbcLb-Sf <sup>u</sup>     | AGACCTTTTTGAAGAAGGTTCTGT               | 62.2    | 55      | Dong et al. [2014]        |
| rbcLb-Sr <sup>u</sup>     | TCGGTCAGAGCAGGCATATGCCA                | 74.7    |         |                           |
| 1R_KIM-r <sup>u</sup>     | ACCCAGTCCATCTGGAAATCTTGTTTC            | 72.1    | 52      | Ki-Joong Kim <sup>p</sup> |
| 3F_KIM-f <sup>u</sup>     | CGTACAGTACTTTTGTGTTTACGAG              | 60.6    |         |                           |
| ITS5 <sup>u</sup>         | GGAAGTAAAAGTCGTAACAAGG                 | 58.4    | 56      | White et al. [1990]       |
| ITS4 <sup>u</sup>         | TCCTCCGCTTATTGATATGC                   | 61.5    |         |                           |
| Bbo-C-407-r <sup>d</sup>  | AGGBGGRCC <sup>d</sup> TSGRAAAGTTTTCGA | 58.7    |         | current study             |
| Dian-T-223-r <sup>d</sup> | CGGGCTCGATGTGGTAGTAA                   | 64.9    |         |                           |
| Cym-A-254-r <sup>d</sup>  | AGCTACATAACAGATATATTGATCAGG            | 59.5    |         |                           |

<sup>d</sup> diagnostic primer (ARMS), destabilizing nucleotide underlined

<sup>u</sup> universal primer

<sup>p</sup> unpublished

**Table 3.** GenBank sequence accessions of two plastid DNA regions (rbcL and matK) used in the current study.

| Taxon                                    | rbcL     | matK     |
|------------------------------------------|----------|----------|
| <b><i>Arundinarieae</i></b>              |          |          |
| <i>Arundinaria gigantea subsp. tecta</i> | AJ746179 | EF125165 |
| <i>Borinda emeryi</i>                    | EF125079 | EF125167 |
| <i>Chimonobambusa marmorea</i>           | AJ746176 | EF125168 |
| <i>Drepanostachyum falcatum</i>          | AJ746265 | EF125170 |
| <i>Fargesia dracocephala</i>             | AJ746266 | KP685610 |
| <i>Fargesia sp. Asmussen</i>             | AM110249 | AM114722 |
| <i>Indocalamus latifolius</i>            | AJ746177 | EF125173 |
| <i>Phyllostachys aurea</i>               | HE573324 | AF164390 |
| <i>Phyllostachys bambusoides</i>         | AB088833 | AB088805 |
| <i>Phyllostachys nigra</i>               | HE573325 | EU434241 |
| <i>Pleioblastus maculatus</i>            | JN247242 | JN247148 |
| <i>Pseudosasa amabilis</i>               | AJ746273 | KP093752 |
| <i>Pseudosasa japonica</i>               | FN870405 | HG794001 |
| <i>Thamnocalamus spathiflorus</i>        | EF125087 | KP685639 |
| <b><i>Bambubseae</i></b>                 |          |          |
| <i>Bambusa multiplex</i>                 | M91626   | EF125166 |

**Table 3.** GenBank sequence accessions of two plastid DNA regions (rbcL and matK) used in the current study. (continued)

| Taxon                              | rbcL     | matK     |
|------------------------------------|----------|----------|
| <i>Bambusa valida</i>              | AJ746171 | EU434255 |
| <i>Bambusa vulgaris</i>            | HE573326 | JX428392 |
| <i>Chusquea culeou</i>             | HE575810 | HE575860 |
| <i>Greslania multiflora</i>        | HE575811 | HE575861 |
| <i>Melocanna baccifera</i>         | EF125082 | EF125174 |
| <i>Olmeca recta</i>                | AJ746269 | HQ847275 |
| <i>Otatea acuminata</i>            | AJ746271 | HQ847256 |
| <i>Thyrsostachys siamensis</i>     | EF125088 | EU434261 |
| <b><i>Olyreae</i></b>              |          |          |
| <i>Cryptochloa strictiflora</i>    | JN205319 | EU434281 |
| <i>Olyra latifolia</i>             | EF125090 | AF164386 |
| <i>Pariana radiciiflora</i>        | AY632369 | AF164387 |
| <b><i>Oryzoideae</i></b>           |          |          |
| <i>Oryza sativa Japonica Group</i> | KF731173 | KF731059 |
| <i>Porteresia coarctata</i>        | HE577876 | AF148669 |
| <b><i>Panicoideae</i></b>          |          |          |
| <i>Cymbopogon citratus</i>         | EF125117 | GQ434093 |
| <i>Cymbopogon goeringii</i>        | KC164298 | KF163712 |
| <i>Lophatherum gracile</i>         | HM167472 | JN407183 |
| <b><i>Pooideae</i></b>             |          |          |
| <i>Triticum aestivum</i>           | AY328025 | AF164405 |
| <i>Triticum dicoccon</i>           | LN626623 | HQ894423 |
| <i>Triticum monococcum</i>         | AY836162 | HM540031 |
| <b><i>Caryophyllaceae</i></b>      |          |          |
| <i>Silene baccifera</i>            | KM360741 | JF956236 |
| <i>Silene conica</i>               | EF418564 | FJ589520 |
| <i>Silene gallica</i>              | HM850354 | FJ589528 |
| <i>Silene otites</i>               | KC171366 | FJ589547 |
| <i>Silene pendula</i>              | EF418561 | FJ589550 |
| <i>Silene schafta</i>              | EF418563 | FJ589556 |
| <i>Silene vulgaris</i>             | KT178142 | EU749399 |

**Table 4.** GenBank sequence accessions of one nuclear DNA region (ITS) used in the current study.

| Taxon                            | ITS      |
|----------------------------------|----------|
| <b><i>Caryophyllaceae</i></b>    |          |
| <i>Dianthus albens</i>           | GU440775 |
| <i>Dianthus algetanus</i>        | GU440776 |
| <i>Dianthus anatolicus</i>       | GU440777 |
| <i>Dianthus andrzejowskianus</i> | JN589032 |
| <i>Dianthus anticarius</i>       | GU440778 |
| <i>Dianthus armeria</i>          | GU440780 |
| <i>Dianthus barbatus</i>         | GU440783 |
| <i>Dianthus benearnensis</i>     | GU440784 |
| <i>Dianthus biflorus</i>         | GU440785 |

**Table 4.** GenBank sequence accessions of one nuclear DNA region (ITS) used in the current study. (continued)

| Taxon                                         | ITS      |
|-----------------------------------------------|----------|
| <i>Dianthus bolusii</i>                       | GU440786 |
| <i>Dianthus broteri</i>                       | GU065884 |
| <i>Dianthus broteroi</i>                      | JN589117 |
| <i>Dianthus caespitosus</i>                   | GU440789 |
| <i>Dianthus capitatus</i>                     | GU440792 |
| <i>Dianthus carthusianorum</i>                | GU440794 |
| <i>Dianthus caryophyllus</i>                  | JN589053 |
| <i>Dianthus caucaseus</i>                     | JN589024 |
| <i>Dianthus charidemi</i>                     | GU440795 |
| <i>Dianthus chinensis</i>                     | GU440796 |
| <i>Dianthus corymbosus</i>                    | GU440801 |
| <i>Dianthus costae</i>                        | GU440802 |
| <i>Dianthus cretaceus</i>                     | GU440804 |
| <i>Dianthus crinitus</i>                      | GU440806 |
| <i>Dianthus cruentus</i>                      | GU440807 |
| <i>Dianthus cyri</i>                          | GU440808 |
| <i>Dianthus deltoides</i>                     | GU440809 |
| <i>Dianthus diffusus</i>                      | GU440811 |
| <i>Dianthus eretmopetalus</i>                 | GU440813 |
| <i>Dianthus excelsus</i>                      | GU440815 |
| <i>Dianthus ferrugineus</i>                   | GU440803 |
| <i>Dianthus giganteiformis</i>                | GU440818 |
| <i>Dianthus giganteus</i>                     | GU440819 |
| <i>Dianthus glacialis</i>                     | GU440821 |
| <i>Dianthus gracilis</i>                      | GU440822 |
| <i>Dianthus gratianopolitanus</i>             | JQ307857 |
| <i>Dianthus haematocalyx</i>                  | GU440824 |
| <i>Dianthus hyssopifolius</i>                 | GU440826 |
| <i>Dianthus imereticus</i>                    | JN589026 |
| <i>Dianthus inamoenus</i>                     | JN589070 |
| <i>Dianthus integer</i>                       | GU440827 |
| <i>Dianthus knappii</i>                       | GU440828 |
| <i>Dianthus laingsburgensis</i>               | GU440829 |
| <i>Dianthus langeanus</i>                     | JQ307858 |
| <i>Dianthus libanotis</i>                     | GU440835 |
| <i>Dianthus lusitanus</i>                     | GU440838 |
| <i>Dianthus micranthus</i>                    | GU440839 |
| <i>Dianthus microlepis</i>                    | GU440840 |
| <i>Dianthus micropetalus</i>                  | GU440841 |
| <i>Dianthus mooiensis</i>                     | GU440842 |
| <i>Dianthus multiceps subsp. multiaffinis</i> | GU440843 |
| <i>Dianthus myrtinervius</i>                  | GU440845 |
| <i>Dianthus namaensis</i>                     | GU440846 |
| <i>Dianthus orientalis</i>                    | GU440847 |
| <i>Dianthus pungens</i>                       | GU440852 |
| <i>Dianthus pygmaeus</i>                      | GU440853 |
| <i>Dianthus repens</i>                        | JN589124 |
| <i>Dianthus seguieri</i>                      | JN589106 |
| <i>Dianthus serotinus</i>                     | GU440857 |
| <i>Dianthus serratifolius</i>                 | GU440858 |
| <i>Dianthus serrulatus</i>                    | GU440859 |

**Table 4.** GenBank sequence accessions of one nuclear DNA region (ITS) used in the current study. (continued)

| Taxon                                  | ITS      |
|----------------------------------------|----------|
| <i>Dianthus sinaicus</i>               | JQ307884 |
| <i>Dianthus sp. cdK73</i>              | FJ593175 |
| <i>Dianthus squarrosus</i>             | JN589065 |
| <i>Dianthus stenopetalus</i>           | GU440861 |
| <i>Dianthus strictus</i>               | GU440862 |
| <i>Dianthus strymonis</i>              | GU440863 |
| <i>Dianthus superbus</i>               | FJ980409 |
| <i>Dianthus sylvestris</i>             | GU440870 |
| <i>Dianthus tenuiflorus</i>            | GU440871 |
| <i>Dianthus trifasciculatus</i>        | GU440874 |
| <i>Dianthus tripunctatus</i>           | GU440875 |
| <i>Dianthus viscidus</i>               | GU440879 |
| <i>Dianthus webbianus</i>              | GU440814 |
| <i>Dianthus zeyheri</i>                | GU440881 |
| <i>Dianthus zonatus</i>                | GU440882 |
| <i>Ixoca quadrifida</i>                | JX274534 |
| <i>Lychnis coronata</i>                | JX274529 |
| <i>Melandrium keiskei</i>              | DQ908643 |
| <i>Silene dianthoides</i>              | KJ918494 |
| <i>Silene jennisensis</i>              | KF267895 |
| <i>Silene multicaulis</i>              | KF267891 |
| <i>Silene multiflora</i>               | KF274511 |
| <i>Silene occidentalis</i>             | DQ908656 |
| <i>Silene sibirica</i>                 | JX274521 |
| <i>Silene uralensis subsp. apetala</i> | JX274519 |
| <i>Silene vulgaris</i>                 | KJ918500 |

## REFERENCES

- Dong, W., Cheng, T., Li, C., Xu, C., Long, P., Chen, C., and Zhou, S. (2014). Discriminating plants using the DNA barcode *rbcLb*: An appraisal based on a large data set. *Molecular Ecology Resources*, 14(2):336–343.
- Fofana, B., Harvengt, L., Baudoin, J. P., and Jardin, P. D. U. (1997). New Primers For The Polymerase Chain Amplification Of cpDNA Intergenic Spacers In Phaseolus Phylogeny. *Belgian Journal of Botany*, 129(1997):118–122.
- Kondo, K., Terabayashi, S., Okada, M., Yuan, C., and He, S. (1996). Phylogenetic relationship of medicinally important *Cnidium officinale* and Japanese Apiaceae based on *rbcL* sequences. *Journal of Plant Research*, 109(1982):21–27.
- White, T. J., Bruns, S., Lee, S., and Taylor, J. (1990). Amplification and direct sequencing of fungal ribosomal RNA genes for phylogenetics. In *PCR Protocols: A Guide to Methods and Applications*, pages 315–322. Academic Press, Inc.

**Table 2.** Specimen accessions (Acc) of lemongrass (*C.*, *Cymbopogon*, *Panicoideae*, L1 - L2) and carnation (*D.*, *Dianthus*, *Caryophyllaceae*, D1 - D10) their taxon names and GenBank sequence accessions of three plastid DNA regions (rbcLa, rbcLb and matK-KIM) and for carnation accessions also for one nuclear DNA region (ITS).

| Acc                           | Taxon                       | rbcLa    | rbcLb    | matK-KIM | ITS      |
|-------------------------------|-----------------------------|----------|----------|----------|----------|
| <b><i>Panicoideae</i></b>     |                             |          |          |          |          |
| L1                            | <i>C. citratus</i>          | KU722908 | KU748525 | KU722906 |          |
| L2                            | <i>C. citratus</i>          | KU722907 | KU748524 | KU722905 |          |
| <b><i>Caryophyllaceae</i></b> |                             |          |          |          |          |
| D1                            | <i>D. caryophyllus</i>      | KU722895 | KU722853 | KU722867 | KU722881 |
| D2                            | <i>D. chinensis</i>         | KU722896 | KU722854 | KU722868 | KU722882 |
| D3                            | <i>D. deltoides</i>         | KU722898 | KU722856 | KU722870 | KU722884 |
| D4                            | <i>D. deltoides</i>         | KU722897 | KU722855 | KU722869 | KU722883 |
| D5                            | <i>D. gratianopolitanus</i> | KU722899 | KU722857 | KU722871 | KU722885 |
| D6                            | <i>D. imereticus</i>        | KU722900 | KU722858 | KU722872 | KU722886 |
| D7                            | <i>D. longicalyx</i>        | KU722901 | KU722859 | KU722873 | KU722887 |
| D8                            | <i>D. superbus</i>          | KU722902 | KU722860 | KU722874 | KU722888 |
| D9                            | <i>D. superbus</i>          | KU722903 | KU722861 | KU722875 | KU722889 |
| D10                           | <i>D. turkestanicus</i>     | KU722904 | KU722862 | KU722876 | KU722890 |

**Table 5.** Anatomical diagnostic key used to microscopically differentiate between Bamboo, Lemongrass and Carnation leaf fragments present in Bamboo tea products. General features (GF) of adaxial and abaxial epidermis cells and cell walls (CW) are described in addition to characteristics of bulliform cells (BC), stomata (ST), trichomes (TR) and wax structures (WS). Further features are derived from trichomes of the leaf margin (TM) and structures of the mesophyll (MP).

|              | Bamboo                                            | Lemongrass                                                                | Carnation                                                                        |
|--------------|---------------------------------------------------|---------------------------------------------------------------------------|----------------------------------------------------------------------------------|
| Epidermis-ad | GF                                                | long cells, sinuous curved CW and short cells alternately                 | polygonal cells, mostly straight CW                                              |
|              | BC                                                | 10-30 x 10-20 um CW polygonal, thick, straight to slightly sinuous curved | 70 x 30 um CW polygonal, thick, straight                                         |
| Epidermis-ab | ST                                                | none or dumbbell-shaped guard cells                                       | dumbbell-shaped guard cells                                                      |
|              | TR                                                | none or unicellular, short, thick-walled, acuminate                       | unicellular, short, thick walled, acuminate                                      |
| WS           |                                                   | 1-2 celled, short, minute, thin-walled, papillate                         | diacytic / anisocytic, numerous none or a few, unicellular, short, thick walled  |
|              |                                                   | inconspicuous                                                             |                                                                                  |
| Epidermis-ab | GF                                                | long cells, sinuous curved CW and short cells alternately                 | polygonal cells, mostly straight CW                                              |
|              | BC                                                | none                                                                      | none                                                                             |
| Epidermis-ab | ST                                                | dumbbell-shaped guard cells difficult to see because of wax papilla       | more than adaxial dumbbell-shaped guard cells conspicuous                        |
|              | TR                                                | unicellular, long / short, thick-walled, acuminate                        | unicellular, short, thick-walled, acuminate                                      |
| WS           | 1-2 celled, short, minute, thin-walled, papillate |                                                                           | none or unicellular, thick-walled                                                |
| WS           | papilla                                           |                                                                           | inconspicuous                                                                    |
| TM           |                                                   | mostly unicellular, short, thick-walled, acuminate                        | 1-3 celled, short acuminate mostly unicellular, short, acuminate                 |
| MP           |                                                   | main veins running parallel                                               | reticulate                                                                       |
|              |                                                   | vein pattern tessellate, visible at 40x magnification <sup>a</sup>        | many relatively large crystal druses along main veins and in intercostal regions |

<sup>a</sup> except *Bambusa*

**Table 6.** BLOG bamboo tribe (Aru = *Arundinarieae*, Bam = *Bambuseae*, Oly = *Olyreae*) classification results. BLOG results using bamboo tribes for classification with single marker datasets (*rbcLa*, *rbcLb*, *matKK*) and combined marker datasets (*rbcL*: *rbcLa* + *rbcLb*, *rbcL+matK*: *rbcL* + *matKK*). The diagnostic (LOGic) formulas cover (C) a certain proportion of the sequences, ideally 100 %. Proportion of false positive (FP) and negative (FN) classifications as well as the ratio false to true positive (TP) classifications are shown. The score refers to the Laplace score

| Classes            | C (%) | FN (%) | FP (%) | Score | FP/TP | Formulas                |
|--------------------|-------|--------|--------|-------|-------|-------------------------|
| <b>rbcLa</b>       |       |        |        |       |       |                         |
| Aru                | 96.0  | 4.0    | 0.0    | 0.93  | 0.00  | pos45=T                 |
| Bam                | 100.0 | 0.0    | 3.6    | 0.80  | 0.09  | pos234=C AND pos538=T   |
| Oly                | 100.0 | 0.0    | 0.0    | 0.67  | 0.00  | pos526=T                |
| <b>rbcLb</b>       |       |        |        |       |       |                         |
| Aru                | 100.0 | 0.0    | 0.0    | 0.93  | 0.00  | pos343!=G AND pos497!=G |
| Bam                | 100.0 | 0.0    | 0.0    | 0.86  | 0.00  | pos204=C AND pos771=C   |
| Oly                | 100.0 | 0.0    | 0.0    | 0.67  | 0.00  | pos546=A                |
| <b>rbcL</b>        |       |        |        |       |       |                         |
| Aru                | 100.0 | 0.0    | 0.0    | 0.93  | 0.00  | pos252=G AND pos1103!=C |
| Bam                | 100.0 | 0.0    | 0.0    | 0.86  | 0.00  | pos526=C AND pos1103=C  |
| Oly                | 100.0 | 0.0    | 0.0    | 0.67  | 0.00  | pos878=A                |
| <b>matKK</b>       |       |        |        |       |       |                         |
| Aru                | 100.0 | 0.0    | 0.0    | 0.93  | 0.00  | pos632=G                |
| Bam                | 100.0 | 0.0    | 0.0    | 0.86  | 0.00  | pos667=G AND pos688=A   |
| Oly                | 100.0 | 0.0    | 0.0    | 0.67  | 0.00  | pos536=A                |
| <b>rbcL + matK</b> |       |        |        |       |       |                         |
| Aru                | 100.0 | 0.0    | 0.0    | 0.93  | 0.00  | pos1788=G               |
| Bam                | 100.0 | 0.0    | 0.0    | 0.86  | 0.00  | pos1485=C AND pos1844=A |
| Oly                | 100.0 | 0.0    | 0.0    | 0.67  | 0.00  | pos1692=A               |
